# Supplementary material
Source: PubMed Central journal article supplement (PMC3868358)
Supplement: Supp_Fig1.pdf [file Supp_Fig1.pdf]

## Supplementary Data

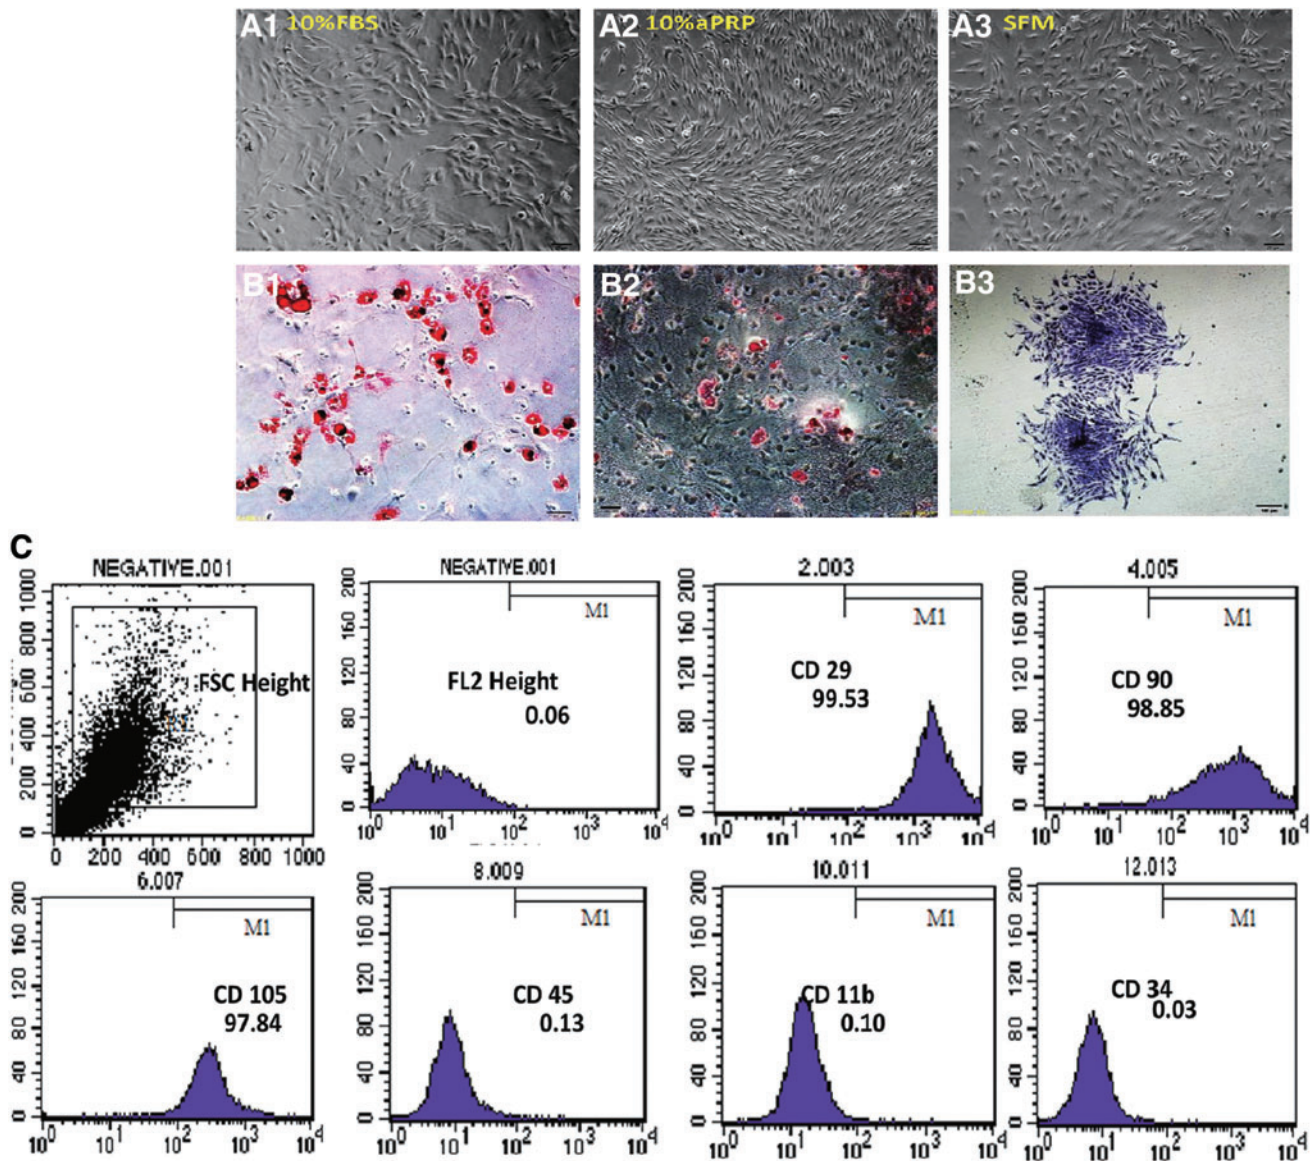

**SUPPLEMENTARY FIG. S1.** Identification of cultured rat BM-MSCs. (A1–A3) Showing the morphology of BM-MSCs cultured in 10% aPRP, 10% FBS, and SFM. (B1–B3) Showing adipogenic and osteogenic differentiation capacity, as well as high CFU-F ability of BM-MSCs. (C) Flow cytometric analysis of surface-marker expression on MSCs. ( $n=4$ ) (original magnification  $20\times$ , scale bar = 25  $\mu\text{m}$ ). BM-MSCs, bone marrow-derived mesenchymal stem cells; CFU-f, fibroblastoid colony-forming unit; FBS, fetal bovine serum; MSCs, mesenchymal stem cells; PRP, platelet rich plasma; SFM, serum-free medium.
