# Supplementary material
Source: PubMed Central journal article supplement (PMC3868358)
Supplement: Supp_Table1.pdf [file Supp_Table1.pdf]

SUPPLEMENTARY TABLE S1. THE PRIMER SETS  
OF DETECTED GENES

| <i>The name<br/>of genes</i>         | <i>Primer</i>                                                                       |
|--------------------------------------|-------------------------------------------------------------------------------------|
| <i>VEGF<math>\alpha</math></i>       | Forword: 5'-CGGACAGACAGACAGACACC-3'<br>Reverse: 5'-CCCAGAAGTTGGACGAAAAG-3'          |
| <i>PDGF<math>\alpha\alpha</math></i> | Forword: 5'-GCCTGCAAGTGTGAGACAG<br>TAG-3'<br>Reverse: 5'-GTGCTTAAACTTTCGGTGCTTC-3'  |
| <i>PDGFR-<math>\alpha</math></i>     | Forword: 5'-GATGGGCAGAGATTCAACAAGA-3'<br>Reverse: 5'-AGGTGGAGTCGTAAGGCAACT-3'       |
| <i>PI3K</i>                          | Forword: 5'-ACTGGTAGACGATGACGAG-<br>GAT-3'<br>Reverse: 5'-GTTGATGACGCAATGTTTGACT-3' |
| <i>AKT1</i>                          | Forword: 5'-GTGTGGCAAGATGTGTAT<br>GAGAA-3'<br>Reverse: 5'-TGAGTAGGAGAAGTGGGGAAAG-3' |
| <i>NF-<math>\kappa</math>B</i>       | Forword: 5'-TTACGGGAGATGTGAAGATGC-3'<br>Reverse: 5'-TGAAGGTGGATGATGGCTAAG-3'        |
